# Supplementary material for: Palmitic Acid Inhibits Cell Proliferation and Tumor Growth of Endometrial Cancer In Vitro and In Vivo
Source: Preprints.org preprint supplement (doi:10.20944/preprints202401.2205.v1), 2024-01-31
Supplement: Supplementary file 1 [file supplementary]

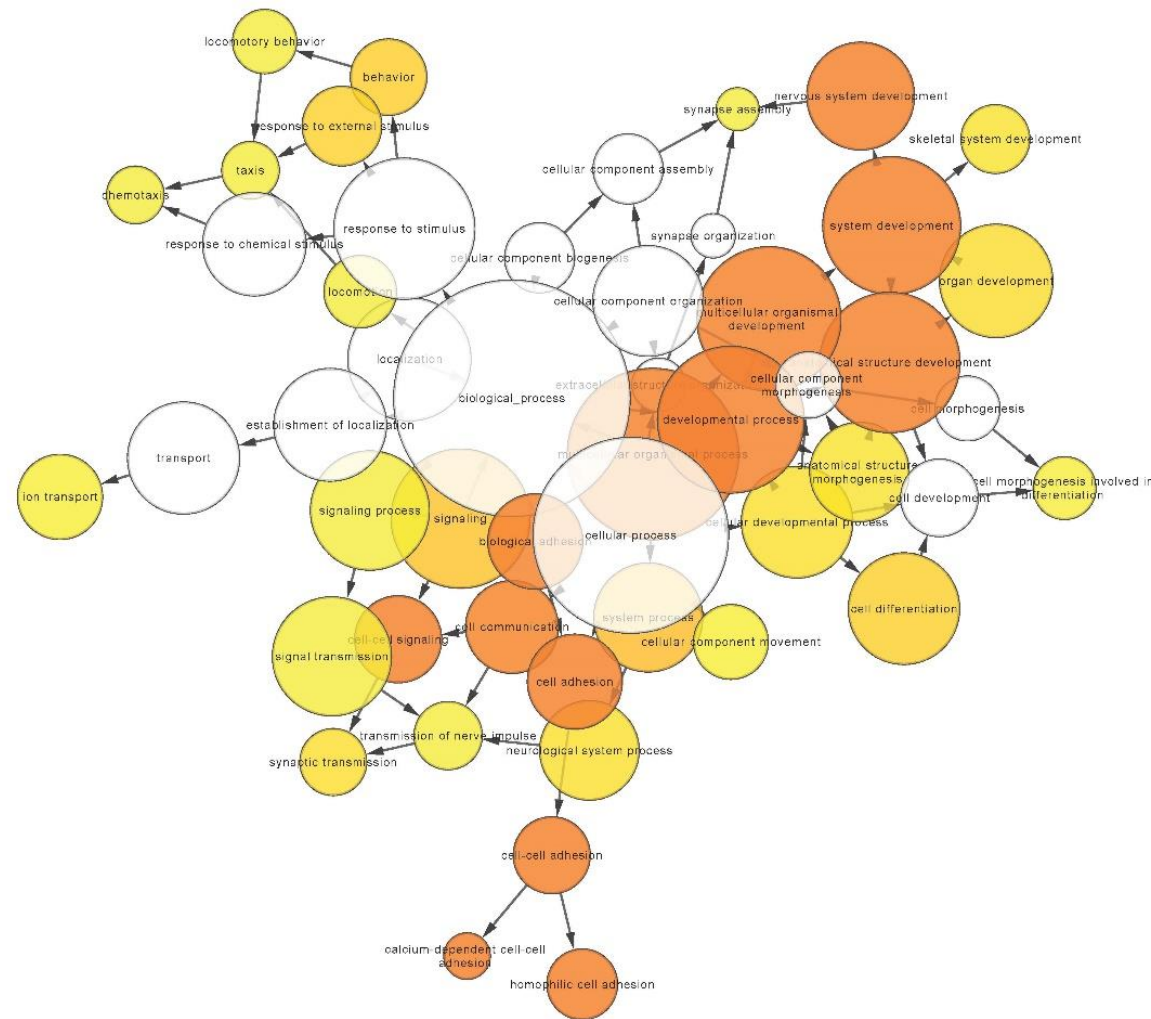

**Supplemental Figure 2.** Identification of molecular functional changes in ECC-1 and Ishikawa cell lines through RNA-seq data,  $p < 0.01$

**Supplementary Table. Clinical and pathological characteristics of 17 patients with endometrial carcinoma**

| Case | Age | Race             | Stage | Tumor size(cm) | Histology                                   | HER2     |
|------|-----|------------------|-------|----------------|---------------------------------------------|----------|
| EC1  | 54  | Hispanic (White) | IA    | 3.5            | Endometrioid, grade 2                       | Negative |
| EC2  | 73  | White            | IA    | 4.5            | Endometrioid, grade 1                       | Negative |
| EC3  | 46  | Hispanic (White) | IA    | 2.2            | Endometrioid, grade 1                       | N/A      |
| EC4  | 58  | Black            | II    | 2.2            | High grade serous                           | Negative |
| EC5  | 65  | White            | IA    | 3.1            | High grade serous                           | N/A      |
| EC6  | 46  | Black            | IA    | 3.5            | Endometrioid, grade 3                       | N/A      |
| EC7  | 63  | Black            | IA    | 4.5            | Endometrioid, grade 1                       | N/A      |
| EC8  | 43  | Black            | IIIC1 | 0.5            | Endometrioid, grade 1                       | N/A      |
| EC9  | 63  | Black            | IA    | 0.8            | High grade serous                           | Negative |
| EC10 | 80  | White            | IB    | 5.3            | Endometrioid, grade 2                       | N/A      |
| EC11 | 40  | White            | IA    | 3.7            | Endometrioid, grade 1                       | N/A      |
| EC12 | 67  | White            | IA    | 4.8            | Endometrioid, grade 2                       | N/A      |
| EC13 | 74  | White            | IB    | 6              | Endometrioid, grade 1                       | N/A      |
| EC14 | 54  | Hispanic (White) | IA    | 3.3            | Endometrioid, grade 1                       | N/A      |
| EC15 | 64  | White            | IB    | 5              | Dedifferentiated endometrial adenocarcinoma | N/A      |
| EC16 | 69  | White            | IA    | 3.3            | Endometrioid, grade 1                       | N/A      |
| EC17 | 84  | White            | IA    | 2.2            | High grade serous                           | Negative |
